# Supplementary material for: Influence of noncovalent intermolecular interactions on crystal packing: syntheses and crystal structures of three layered Zn(ii)/1,2,4-triazole/carboxylate coordination polymers
Source: Royal Society of Chemistry journal article supplement (doi:10.1039/b901445d), 2009-01-01

## Supporting Information

### **Influence of Noncovalent Intermolecular Interactions on Crystal Packing: Syntheses and Crystal Structures of Three Layered Zn(II)/1, 2, 4-Triazole/Carboxylate Coordination Polymers**

Zhe Song, Hongze Gao, Guanghua Li, Yang Yu, Zhan Shi<sup>\*</sup>, and Shuohua Feng

*State Key Laboratory of Inorganic Synthesis and Preparative Chemistry, College of Chemistry, Jilin University, Changchun 130012, People's Republic of China.*

\*To whom correspondence should be addressed. Fax: +86-431-85168624.

E-mail: zshi@mail.jlu.edu.cn.

**Table S1.** Selected bond distances /Å and bond angles /° for **1- 3**

---

| <b>Compound 1</b>   |            |                      |            |
|---------------------|------------|----------------------|------------|
| Zn(1)-O(2)          | 1.9886(13) | Zn(1)-N(1)#1         | 2.0026(12) |
| Zn(1)-N(3)          | 2.0106(13) | Zn(1)-N(2)#2         | 2.0231(13) |
| N(1)-Zn(1)#3        | 2.0026(12) | N(2)-Zn(1)#4         | 2.0231(13) |
| O(2)-Zn(1)-N(1)#1   | 127.63(6)  | O(2)-Zn(1)-N(3)      | 102.89(5)  |
| N(1)#1-Zn(1)-N(3)   | 112.21(6)  | O(2)-Zn(1)-N(2)#2    | 100.99(5)  |
| N(1)#1-Zn(1)-N(2)#2 | 103.74(5)  | N(3)-Zn(1)-N(2)#2    | 107.63(6)  |
| <b>Compound 2</b>   |            |                      |            |
| Zn(1)-O(1)          | 1.960(6)   | Zn(1)-N(4)           | 2.001(5)   |
| Zn(1)-N(3)          | 2.016(5)   | Zn(1)-N(5)#1         | 2.035(5)   |
| Zn(2)-O(3)          | 1.943(5)   | Zn(2)-N(2)#2         | 1.998(5)   |
| Zn(2)-N(6)#3        | 2.019(5)   | Zn(2)-N(1)           | 2.047(5)   |
| Zn(3)-O(5)          | 1.956(5)   | Zn(3)-N(11)#4        | 2.002(5)   |
| Zn(3)-N(9)          | 2.013(5)   | Zn(3)-N(10)          | 2.041(5)   |
| Zn(4)-O(8)          | 1.953(6)   | Zn(4)-N(7)           | 1.987(5)   |
| Zn(4)-N(12)#5       | 2.017(5)   | Zn(4)-N(8)#6         | 2.050(5)   |
| O(1)-Zn(1)-N(4)     | 119.2(2)   | O(1)-Zn(1)-N(3)      | 115.3(2)   |
| N(4)-Zn(1)-N(3)     | 110.5(2)   | O(1)-Zn(1)-N(5)#1    | 100.4(2)   |
| N(4)-Zn(1)-N(5)#1   | 107.4(2)   | N(3)-Zn(1)-N(5)#1    | 101.5(2)   |
| O(3)-Zn(2)-N(2)#2   | 121.4(2)   | O(3)-Zn(2)-N(6)#3    | 111.4(2)   |
| N(2)#2-Zn(2)-N(6)#3 | 113.3(2)   | O(3)-Zn(2)-N(1)      | 98.3(2)    |
| N(2)#2-Zn(2)-N(1)   | 106.73(19) | N(6)#3-Zn(2)-N(1)    | 102.6(2)   |
| O(5)-Zn(3)-N(11)#4  | 119.6(2)   | O(5)-Zn(3)-N(9)      | 111.8(2)   |
| N(11)#4-Zn(3)-N(9)  | 113.9(2)   | O(5)-Zn(3)-N(10)     | 100.8(2)   |
| N(11)#4-Zn(3)-N(10) | 106.0(2)   | N(9)-Zn(3)-N(10)     | 102.0(2)   |
| O(8)-Zn(4)-N(7)     | 119.6(2)   | O(8)-Zn(4)-N(12)#5   | 118.3(2)   |
| N(7)-Zn(4)-N(12)#5  | 110.3(2)   | O(8)-Zn(4)-N(8)#6    | 97.3(2)    |
| N(7)-Zn(4)-N(8)#6   | 107.4(2)   | N(12)#5-Zn(4)-N(8)#6 | 100.4(2)   |

---

---

**Compound 3**

|                      |           |                    |           |
|----------------------|-----------|--------------------|-----------|
| Zn(1)-O(1)           | 1.947(13) | Zn(1)-N(1)         | 1.983(13) |
| Zn(1)-N(9)           | 2.012(15) | Zn(1)-N(4)         | 2.054(11) |
| Zn(2)-O(3)           | 1.966(14) | Zn(2)-N(5)         | 1.980(13) |
| Zn(2)-N(12)          | 2.026(13) | Zn(2)-N(2)         | 2.030(11) |
| Zn(3)-O(6)           | 1.938(14) | Zn(3)-N(8)#1       | 1.959(13) |
| Zn(3)-N(3)           | 2.005(12) | Zn(3)-N(10)#2      | 2.051(11) |
| Zn(4)-O(8)           | 1.962(14) | Zn(4)-N(11)#3      | 2.009(13) |
| Zn(4)-N(7)           | 2.019(11) | Zn(4)-N(6)#2       | 2.029(12) |
|                      |           |                    |           |
| O(1)-Zn(1)-N(1)      | 122.1(5)  | O(1)-Zn(1)-N(9)    | 115.5(6)  |
| N(1)-Zn(1)-N(9)      | 110.7(5)  | O(1)-Zn(1)-N(4)    | 96.6(6)   |
| N(1)-Zn(1)-N(4)      | 107.1(5)  | N(9)-Zn(1)-N(4)    | 101.0(5)  |
| O(3)-Zn(2)-N(5)      | 120.9(6)  | O(3)-Zn(2)-N(12)   | 114.4(6)  |
| N(5)-Zn(2)-N(12)     | 111.9(5)  | O(3)-Zn(2)-N(2)    | 97.3(5)   |
| N(5)-Zn(2)-N(2)      | 107.6(5)  | N(12)-Zn(2)-N(2)   | 101.4(5)  |
| O(6)-Zn(3)-N(8)#1    | 118.9(6)  | O(6)-Zn(3)-N(3)    | 116.8(6)  |
| N(8)#1-Zn(3)-N(3)    | 112.0(5)  | O(6)-Zn(3)-N(10)#2 | 96.9(6)   |
| N(8)#1-Zn(3)-N(10)#2 | 107.7(5)  | N(3)-Zn(3)-N(10)#2 | 101.1(5)  |
| O(8)-Zn(4)-N(11)#3   | 122.0(5)  | O(8)-Zn(4)-N(7)    | 98.7(5)   |
| N(11)#3-Zn(4)-N(7)   | 105.9(5)  | O(8)-Zn(4)-N(6)#2  | 116.0(6)  |
| N(11)#3-Zn(4)-N(6)#2 | 109.9(5)  | N(7)-Zn(4)-N(6)#2  | 100.6(5)  |

---

Symmetry codes for **1**: #1 (x,-y+1/2,z+1/2), #2 (-x-1,y+1/2,-z-1/2), #3 (x,-y+1/2,z-1/2), #4 (-x-1,y-1/2,-z-1/2); for **2**: #1 (-x+1,-y+3,-z), #2 (-x+2,-y+2,-z), #3 (-x+1,-y+2,-z), #4 (-x,-y+1,-z+1), #5 (-x,-y,-z+1), #6 (-x-1,-y,-z+1); for **3**: #1 (x-1/2,y+1/2,z), #2 (x+1/2,y+1/2,z), #3 (x+1,y,z).

**Figure S1.** TGA plots of compound **1** (a), **2** (b) and **3** (c).

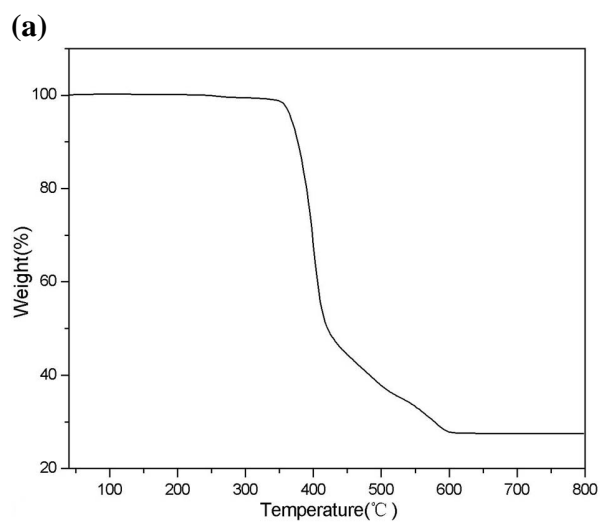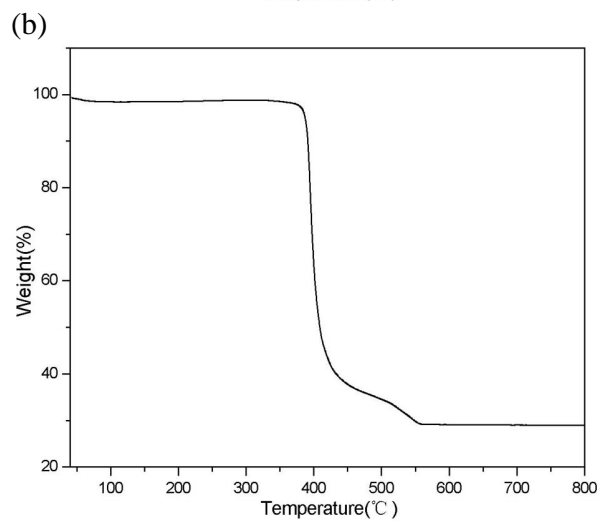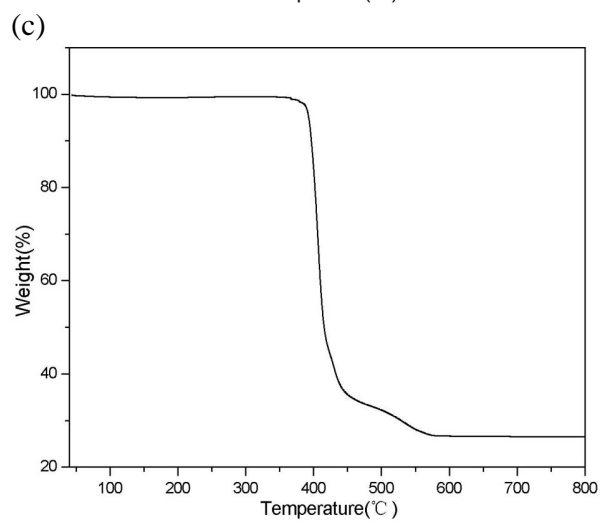

**TG analysis.** TGA of each compound was performed using a Netzsch STA 449C instrument. Each sample was heated from room temperature to 800 °C in air with a heating rate of 10.0 °C /min. The TGA curve of compound **1** displays one continuous events between 40 and 800 °C. The structure of compound **1** is stable up to 350 °C. The event occurred at 350 – 600 °C where the organic linkers got destroyed (observed, 72.47 %; calculated, 72.68 %) (Figure S1 a). TGA of **2** first shows a weight loss (found 0.83 %) from 40 to 120 °C, which is attributed to the loss of guest water molecules (calcd 0.82 %). The structure is stable up to 385 °C. A sharp weight loss observed between 385 and 540 °C. The total weight loss was 70.17 %, which corresponds to the loss of organic linker groups (calcd 69.55 %) (Figure S1 b). The TGA curve of compound **3** is similar to compound **1** and **2**. It is stable up to 400 °C. The event occurred at 400 – 580 °C where the organic linkers got destroyed (observed, 73.48 %; calculated, 71.84 %) (Figure S1 c).

**Figure S2.** The coordination environment of compounds **1** (a), **2** (b) and **3** (c).

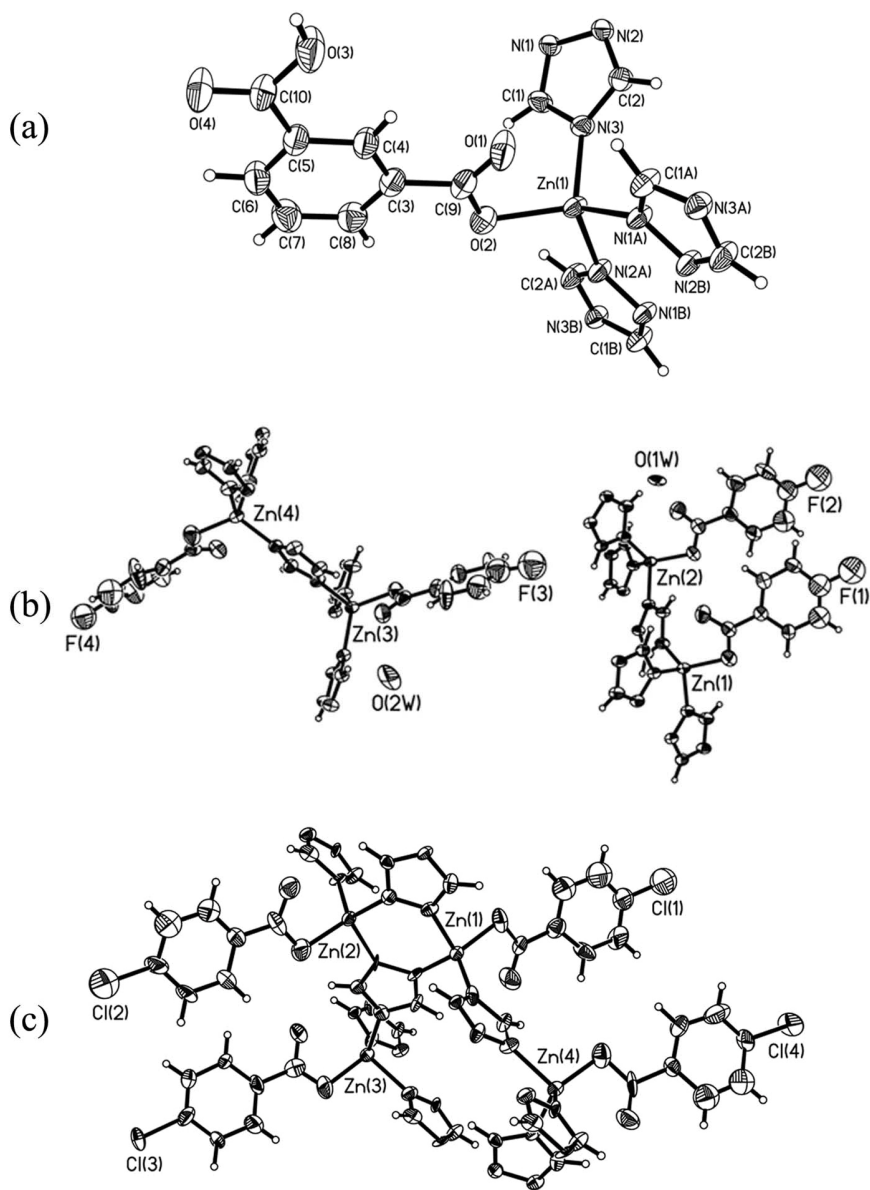

Supplement: b901445d.pdf [file b901445d.pdf]
